# Supplementary material for: The Photocatalytic Conversion of Carbon Dioxide to Fuels Using Titanium Dioxide Nanosheets/Graphene Oxide Heterostructure as Photocatalyst
Source: MDPI journal article supplement (doi:10.3390/nano13020320), 2023-01-12
Supplement: s1 [file s1]

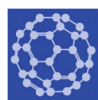

## Supplementary Materials

# The photocatalytic conversion of carbon dioxide to fuels using titanium dioxide nanosheets/graphene oxide heterostructure as photocatalyst

Apisit Karawek <sup>1</sup>, Kittipad Kittipoom <sup>1</sup>, Labhassiree Tansuthepverawongse <sup>1</sup>, Nutkamol Kitjanukit <sup>1</sup>, Wannisa Neamsung <sup>1</sup>, Napat Lertthanaphol <sup>1</sup>, Prowpatchara Chanthara <sup>1</sup>, Sakhon Ratchahat <sup>2</sup>, Poomiwat Phadungbut <sup>1</sup>, Pat-taraporn Kim-Lohsoontorn <sup>3</sup> and Sira Srinives <sup>1,\*</sup>

<sup>1</sup> Nanocomposite Engineering Laboratory (NanoCEN), Department of Chemical Engineering, Faculty of Engineering, Mahidol University, Nakhon Pathom, 73170, Thailand.

<sup>2</sup> Department of Chemical Engineering, Faculty of Engineering, Mahidol University, Nakhon athom, 73170, Thailand.

<sup>3</sup> Center of Excellence on Catalysis and Catalytic Reaction Engineering, Department of Chemical Engineering, Faculty of Engineering, Chulalongkorn University, Bangkok, 10330, Thailand

\* Correspondence: sira.sri@mahidol.ac.th

**Citation:** Karawek, A.; Kittipoom, K.; Tansuthepverawongse, L.; Kitjanukit, N.; Neamsung, W.; Lertthanaphol, N.; Chanthara, P.; Ratchahat, S.; Phadungbut, P.; Kim-Lohsoontorn, P.; et al. The Photocatalytic Conversion of Carbon Dioxide to Fuels Using Titanium Dioxide Nanosheets/Graphene Oxide Heterostructure as Photocatalyst. *Nanomaterials* **2023**, *13*, 320. <https://doi.org/10.3390/nano13020320>

Academic Editor: Rafael Camarillo

Received: 31 December 2022

Revised: 6 January 2023

Accepted: 9 January 2023

Published: 12 January 2023

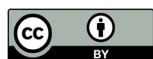

**Copyright:** © 2023 by the authors.

Submitted for possible open access

publication under the terms and

conditions of the Creative Commons

Attribution (CC BY) license

([https://creativecommons.org/licenses](https://creativecommons.org/licenses/by/4.0/)

/by/4.0/).

## This PDF file includes:

|                                                                                                                                       |    |
|---------------------------------------------------------------------------------------------------------------------------------------|----|
| Figure S1. Particle size (a–j) and thickness (k–p) distribution histograms of the TNS, TNP and composites.                            | S2 |
| Table S1. Dimensions of the photocatalysts.                                                                                           | S3 |
| Figure S2. EDS mapping of atomic composition of the CTNSG (a) and CTNPG (b).                                                          | S3 |
| Figure S3. Quantitative results of EDS analysis of the samples.                                                                       | S4 |
| Figure S4. The N <sub>2</sub> adsorption–desorption isotherms (a) and the pore–size distribution curves (b) of the GO, TNSG and TNPG. | S4 |
| Table S2. Physicochemical and optical properties of the samples.                                                                      | S4 |
| Table S3. CO <sub>2</sub> photoreduction products obtained from various operations.                                                   | S5 |
| Figure S5. The FT–IR spectra (a), XRD spectra (b), SEM image (c) and particle size distribution (d) of the virgin and reused CTNSG.   | S6 |

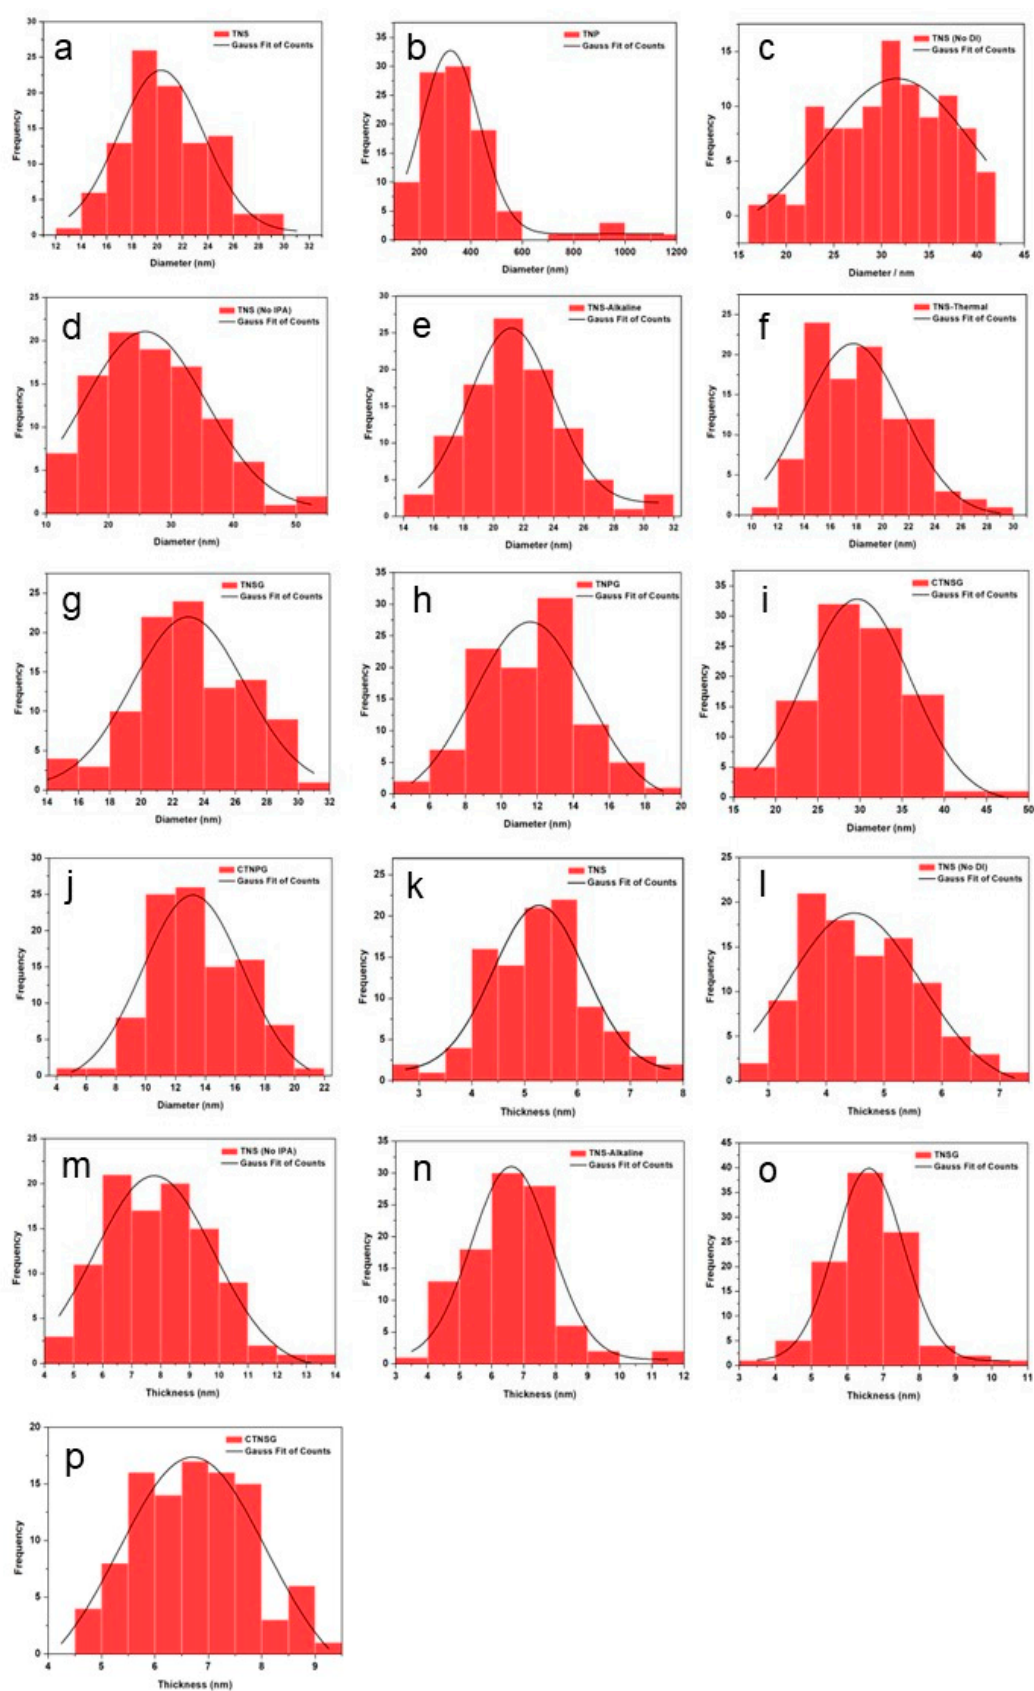

**Figure S1.** Particle size (a–j) and thickness (k–p) distribution histograms of the TNS, TNP and composites.

Table S1. Dimensions of the photocatalysts.

| Catalyst     | Width (nm)      | Thickness (nm) |
|--------------|-----------------|----------------|
| TNS          | $20.3 \pm 0.4$  | $5.3 \pm 0.1$  |
| TNS (HF+IPA) | $31.6 \pm 0.8$  | $4.5 \pm 0.1$  |
| TNS (DI+HF)  | $25.8 \pm 0.6$  | $7.8 \pm 0.2$  |
| TNS-Alkaline | $21.2 \pm 0.2$  | $6.6 \pm 0.1$  |
| TNS-Thermal  | $17.8 \pm 0.6$  | -              |
| TNP          | $320.6 \pm 5.5$ | -              |
| TNSG         | $23.0 \pm 0.5$  | $6.6 \pm 0.1$  |
| TNPG         | $11.6 \pm 0.5$  | -              |
| CTNSG        | $29.7 \pm 0.4$  | $6.7 \pm 0.1$  |
| CTNPG        | $13.2 \pm 0.5$  | -              |

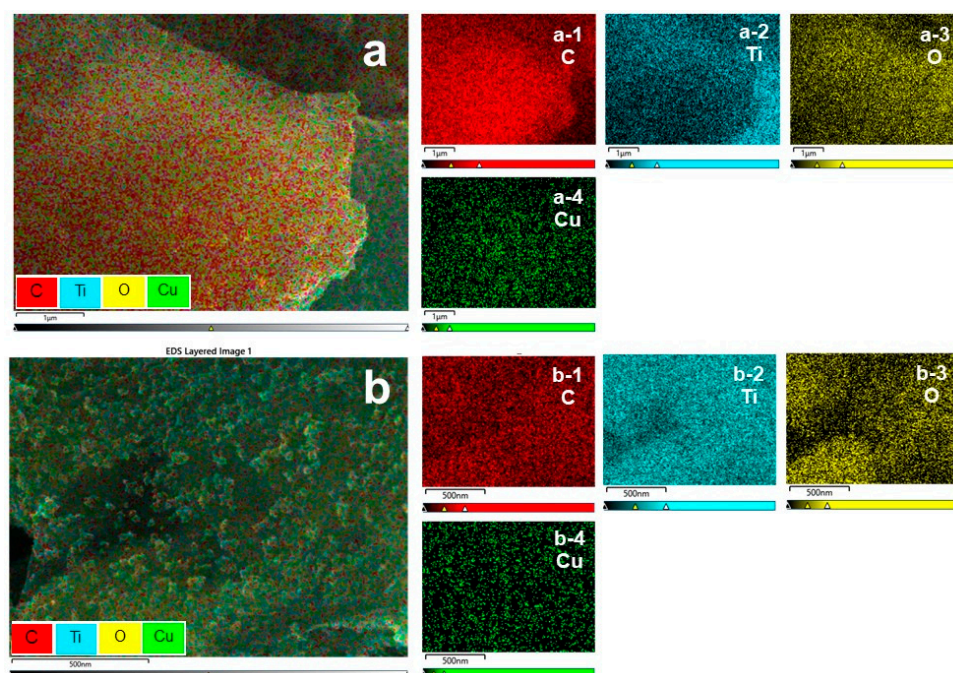

Figure S2. EDS mapping of atomic composition of the CTNSG (a) and CTNPG (b).

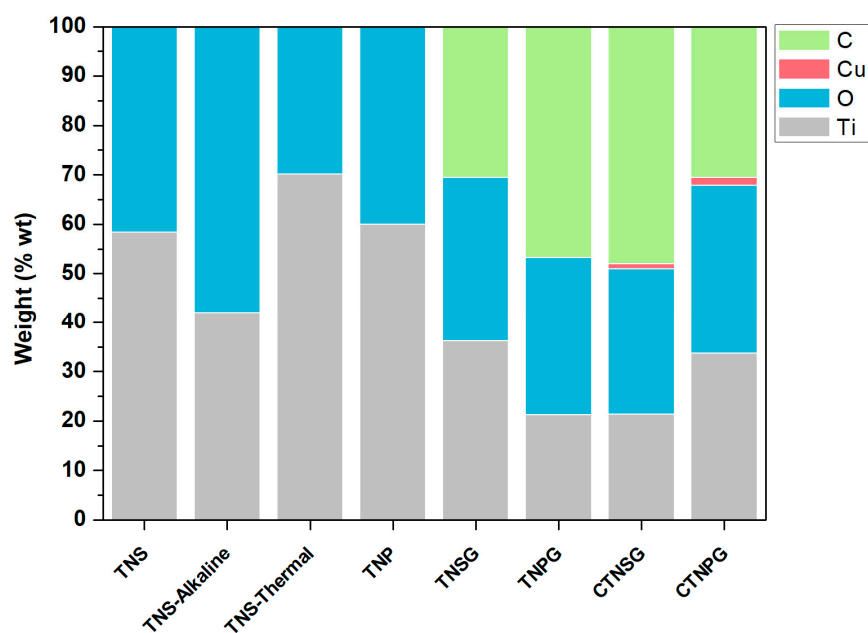

Figure S3. Quantitative EDS analysis of TNS, TNP and composites.

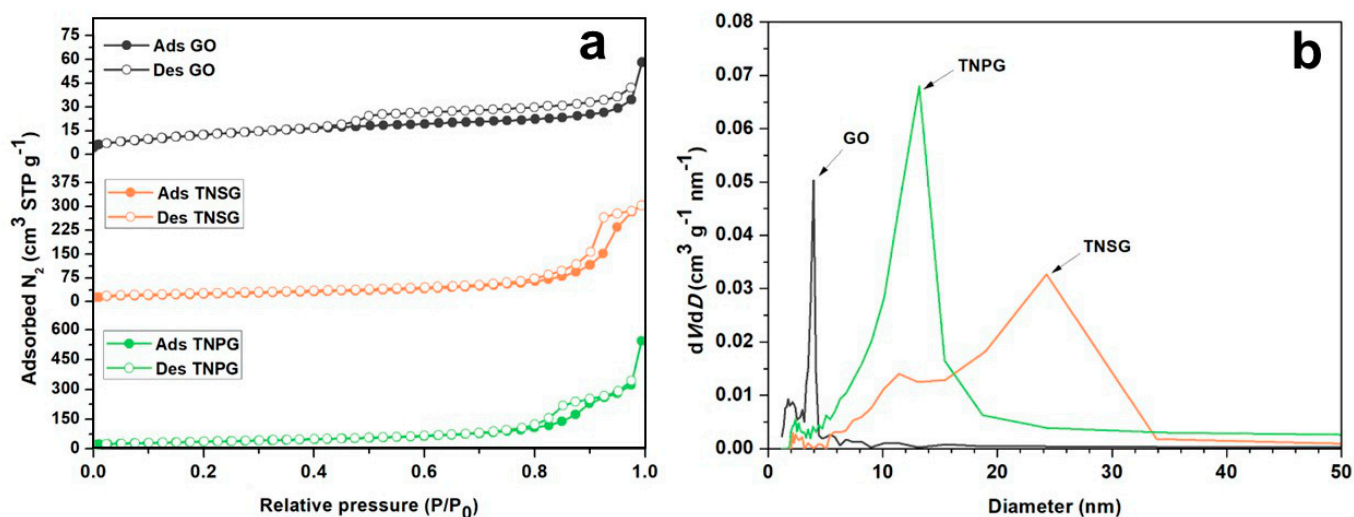

Figure S4. The N<sub>2</sub> adsorption–desorption isotherms (a) and the pore–size distribution curves (b) of the GO, TNSG and TNPG.

Table S2. Physicochemical and optical properties of the samples.

| Catalyst | $S_{\text{BET}}$<br>( $\text{m}^2 \text{g}^{-1}$ ) | Average<br>mesopore size 1<br>(nm) | Average<br>mesopore size 2<br>(nm) | Band gap energy<br>(eV) |
|----------|----------------------------------------------------|------------------------------------|------------------------------------|-------------------------|
| GO       | 50.2                                               | 3.9                                | 0                                  | 2.22                    |
| TNS      | 110.4                                              | 10.1                               | 0                                  | 3.07                    |
| TNP      | 138.2                                              | 13.2                               | 0                                  | 3.38                    |
| TNSG     | 86.4                                               | 11.4                               | 24.29                              | 2.98                    |
| TNPG     | 133.4                                              | 13.2                               | 0                                  | 3.31                    |
| CTNSG    | 81.3                                               | 11.4                               | 33.86                              | 2.66                    |
| CTNPG    | 139.19                                             | 13.1                               | 0                                  | 3.17                    |

**Table S3.** CO<sub>2</sub> photoreduction products obtained from various operations.

| Catalyst     | Condition <sup>1</sup>  |     | Production rate ( $\mu\text{mol h}^{-1}\text{g}_{\text{cat}}^{-1}$ ) |          |         | Total carbon consumption ( $\mu\text{mol g}_{\text{cat}}^{-1}$ ) | %PQE ( $\times 10^{-2}$ ) |
|--------------|-------------------------|-----|----------------------------------------------------------------------|----------|---------|------------------------------------------------------------------|---------------------------|
|              | Light source            | %RH | Methane                                                              | Methanol | Acetone |                                                                  |                           |
| P25          | 160 Watts               | 100 | 0.95                                                                 | 0        | 0.28    | 18.57                                                            | 0.71                      |
| TNS          | 160 Watts               | 100 | 4.30                                                                 | 0        | 0.42    | 27.75                                                            | 0.24                      |
| TNS (HF+IPA) | 160 Watts               | 100 | 0.51                                                                 | 0        | 0.12    | 4.35                                                             | 0.35                      |
| TNS (DI+HF)  | 160 Watts               | 100 | 1.85                                                                 | 0        | 0.56    | 17.65                                                            | 1.39                      |
| TNS-Alkaline | 160 Watts               | 100 | 4.65                                                                 | 0        | 0.48    | 30.45                                                            | 2.63                      |
| TNS-Thermal  | 160 Watts               | 100 | 2.34                                                                 | 0        | 0.39    | 13.50                                                            | 1.46                      |
| TNP          | 160 Watts               | 100 | 2.03                                                                 | 0        | 0.40    | 21.45                                                            | 0.13                      |
| TNSG         | 160 Watts               | 100 | 2.81                                                                 | 0        | 0.69    | 24.40                                                            | 0.20                      |
| TNPG         | 160 Watts               | 100 | 2.28                                                                 | 0        | 0.72    | 22.20                                                            | 0.17                      |
| CTNSG        | 160 Watts               | 100 | 12.09                                                                | 0        | 0.74    | 71.65                                                            | 0.64                      |
| CTNPG        | 160 Watts               | 100 | 4.58                                                                 | 0        | 1.33    | 43.15                                                            | 0.34                      |
| CTNSG        | 160 Watts               | 0   | 2.50                                                                 | 0        | 0.21    | 3.11                                                             | 0.53                      |
| CTNSG        | 160 Watts               | 20  | 4.34                                                                 | 0        | 0.35    | 5.39                                                             | 2.45                      |
| CTNSG        | 160 Watts               | 40  | 5.12                                                                 | 0        | 0.32    | 6.08                                                             | 2.33                      |
| CTNSG        | 160 Watts               | 60  | 6.45                                                                 | 0        | 0.34    | 7.47                                                             | 3.34                      |
| CTNSG        | 160 Watts               | 80  | 9.16                                                                 | 0        | 0.42    | 10.43                                                            | 4.69                      |
| CTNSG        | No                      | 100 | 0                                                                    | 0        | 0       | 0                                                                | 0.00                      |
| CTNSG        | 16 Watts                | 100 | 6.84                                                                 | 1.23     | 3.07    | 86.40                                                            | 47.15                     |
| CTNSG        | 250 Watts               | 100 | 14.09                                                                | 0        | 0.56    | 78.85                                                            | 0.64                      |
| CTNSG        | 16 Watts /<br>160 Watts | 100 | 6.35                                                                 | 1.16     | 2.91    | 81.2                                                             | 44.83                     |

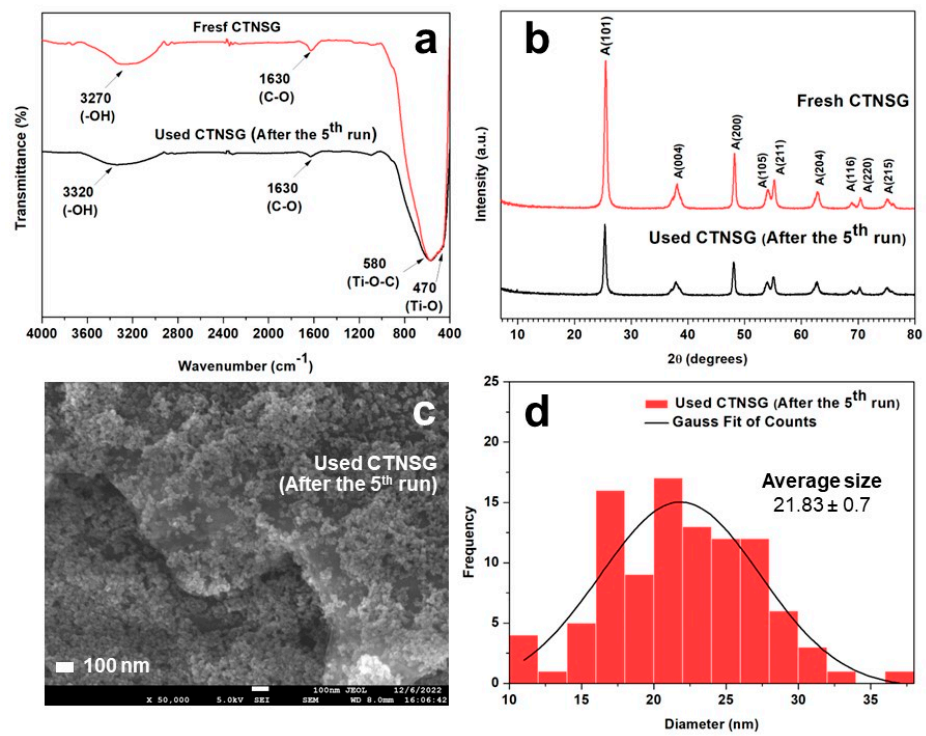

**Figure S5.** The FT-IR spectra (a), XRD spectra (b), SEM image (c) and particle size distribution (d) of the virgin and reused CTNSG.
